# Supplementary material for: Inhibition of mTOR downregulates expression of DNA repair proteins and is highly efficient against BRCA2-mutated breast cancer in combination to PARP inhibition
Source: PubMed Central journal article supplement (PMC6049870; doi:10.18632/oncotarget.25640), 2018-07-03
Supplement: oncotarget-09-29587-s001.pdf [file oncotarget-09-29587-s001.pdf]

## Inhibition of mTOR downregulates expression of DNA repair proteins and is highly efficient against BRCA2-mutated breast cancer in combination to PARP inhibition

### SUPPLEMENTARY MATERIALS

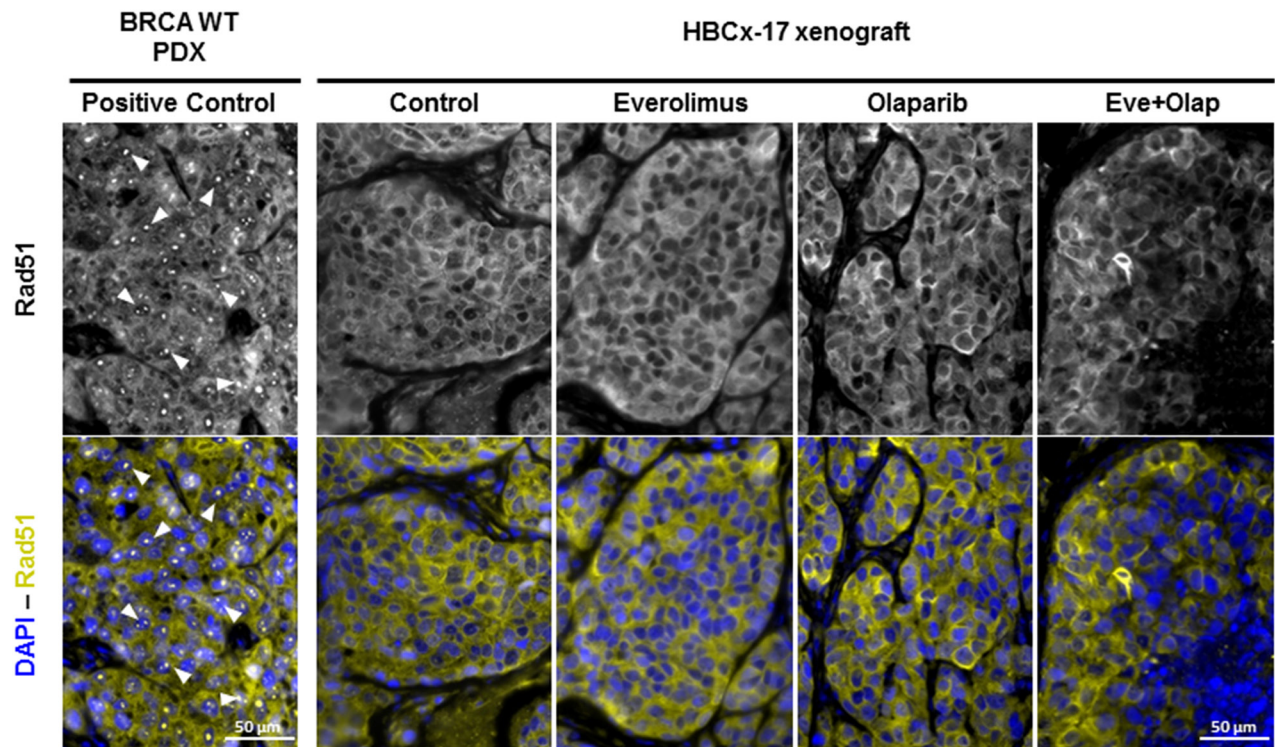

Supplementary Figure 1: Immunofluorescence analysis of RAD51 foci in the HBCx-17 xenograft.

Supplementary Table 1: List of antibodies tested in RPPA analysis.

See Supplementary File 1

Supplementary Table 2: Row data of RPPA analysis.

See Supplementary File 2
